# Supplementary material
Source: PubMed Central journal article supplement (PMC4618174)
Supplement: NIHMS715764-supplement-2.pdf [file NIHMS715764-supplement-2.pdf]

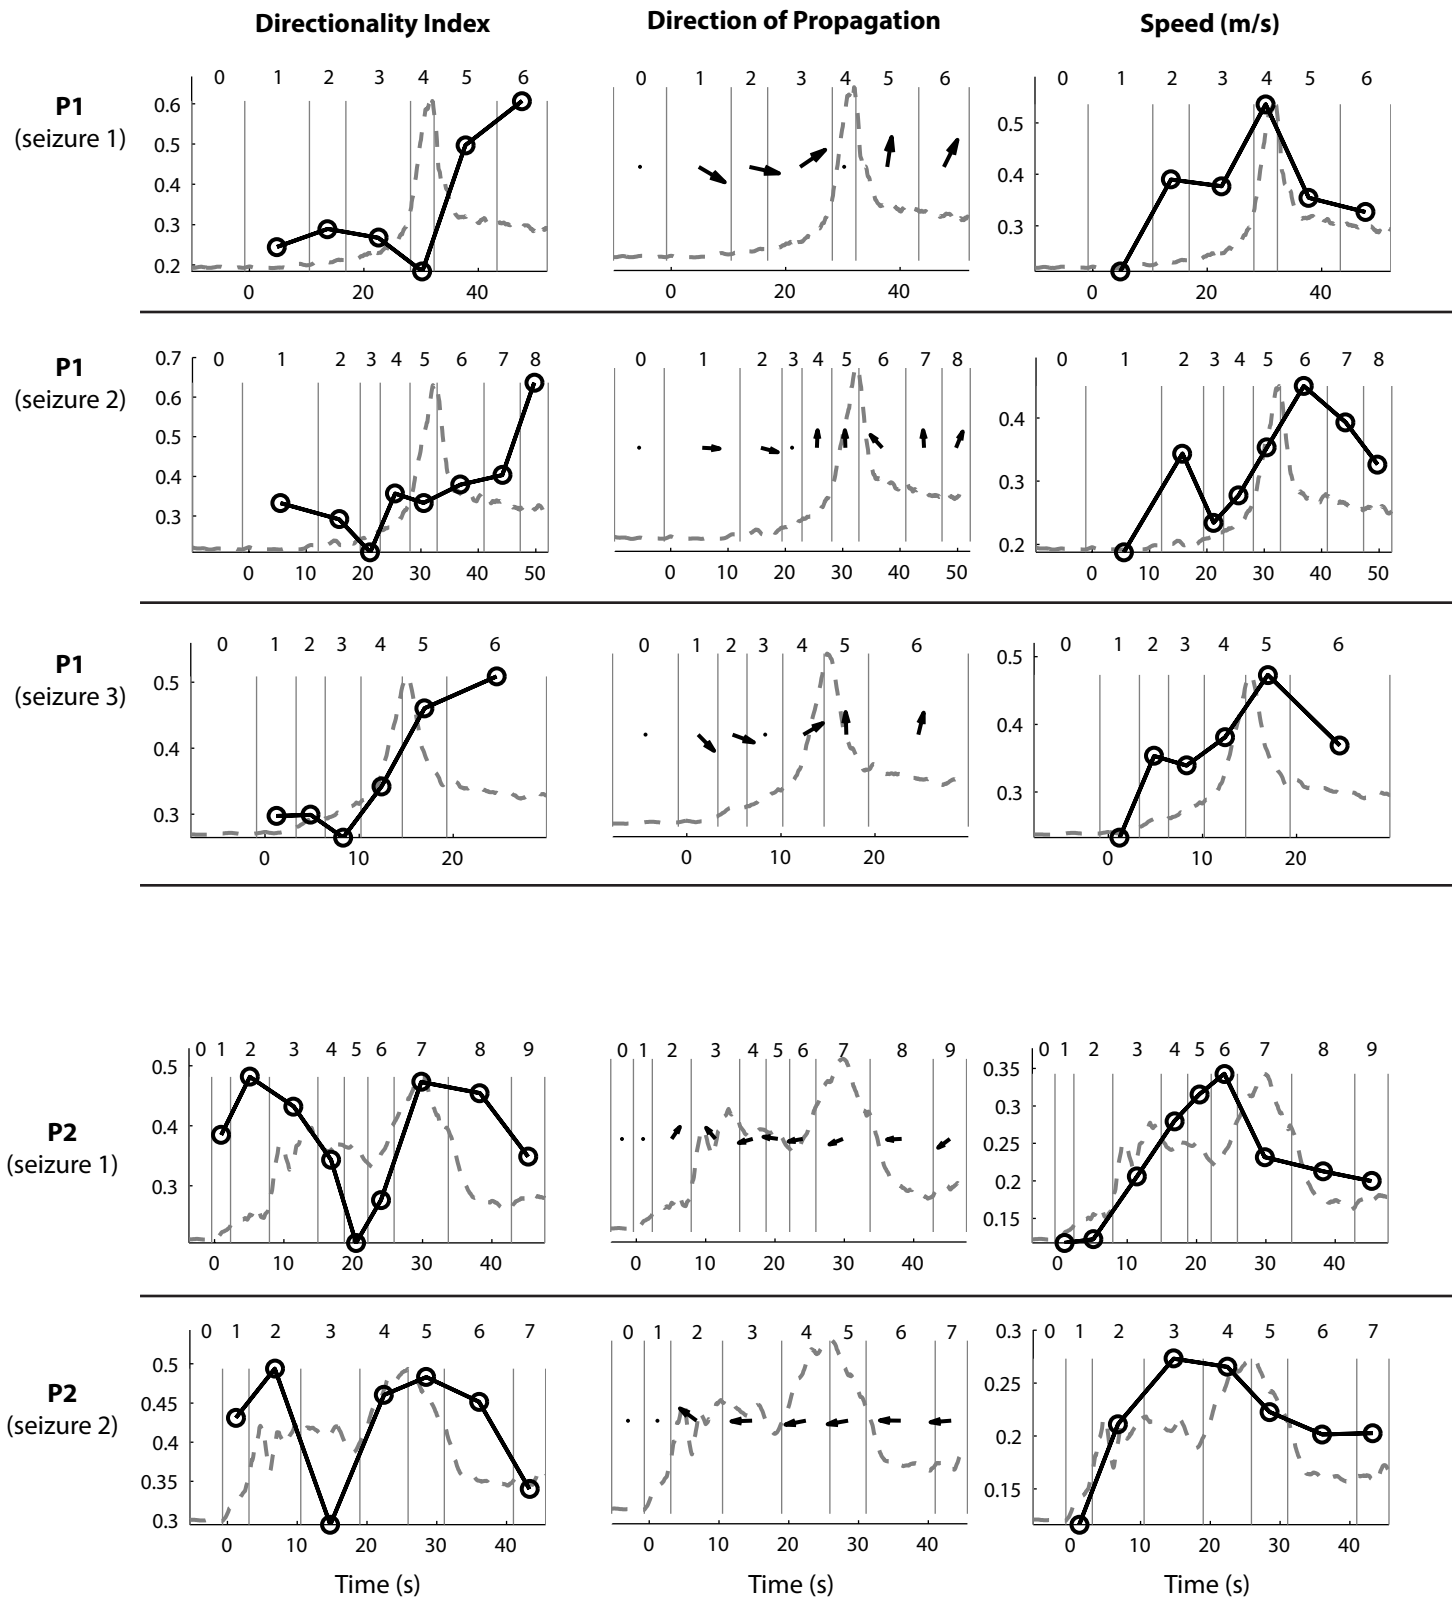

**Figure S2. Propagation characteristics of LFP discharges and gamma oscillations do not reveal a strong association with the peak of MUA rate (part 1: P1 and P2).**
