# Supplementary material
Source: PubMed Central journal article supplement (PMC4618174)
Supplement: NIHMS715764-supplement-3.pdf [file NIHMS715764-supplement-3.pdf]

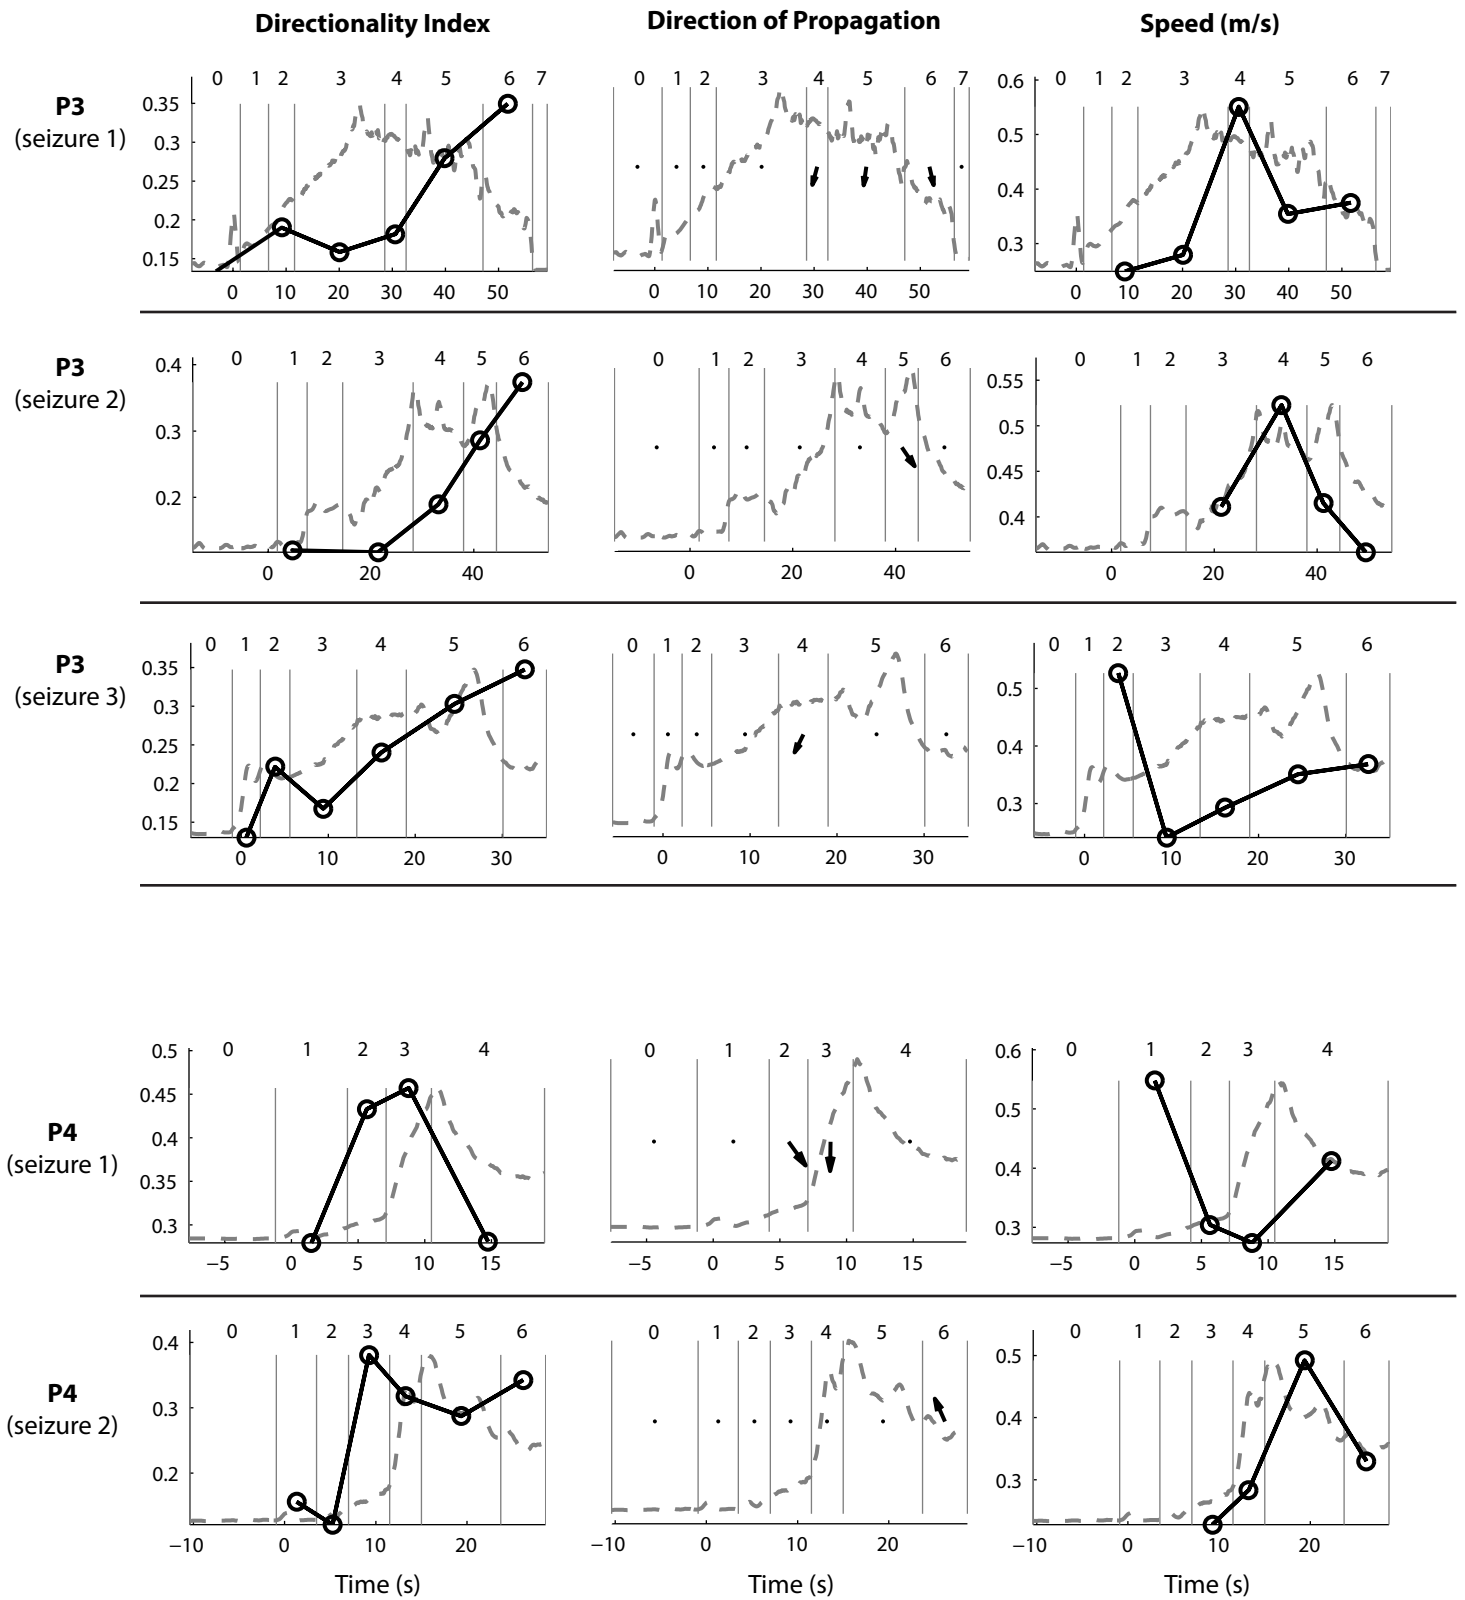

**Figure S2. Propagation characteristics of LFP discharges and gamma oscillations do not reveal a strong association with the peak of MUA rate (part 2: P3 and P4).**
