# Supplementary material
Source: PubMed Central journal article supplement (PMC4618174)
Supplement: NIHMS715764-supplement-4.pdf [file NIHMS715764-supplement-4.pdf]

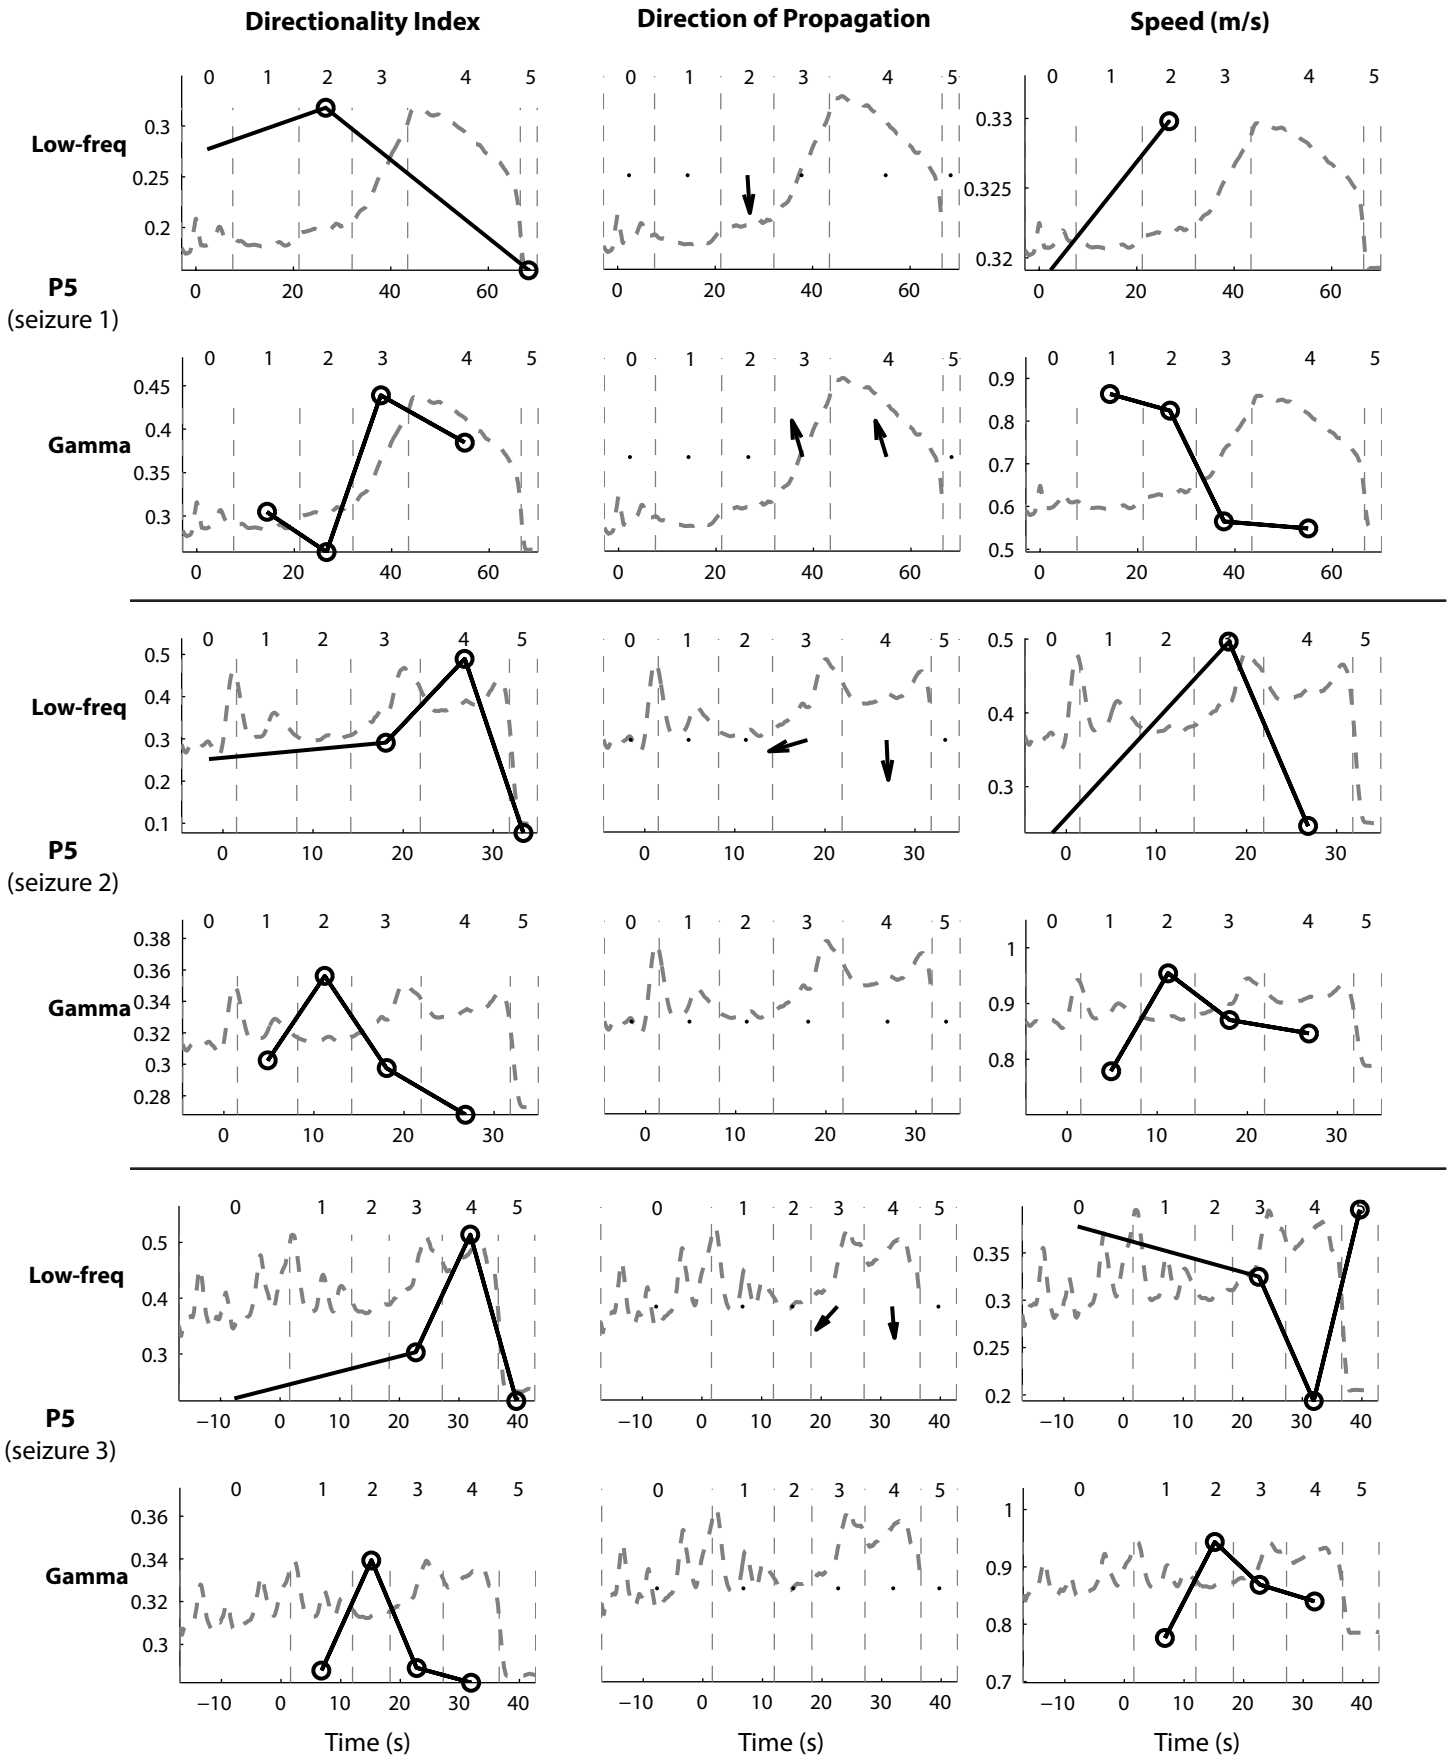

**Figure S2. Propagation characteristics of LFP discharges and gamma oscillations do not reveal a strong association with the peak of MUA rate (part 3: P5).**
