# Supplementary material
Source: PubMed Central journal article supplement (PMC4618174)

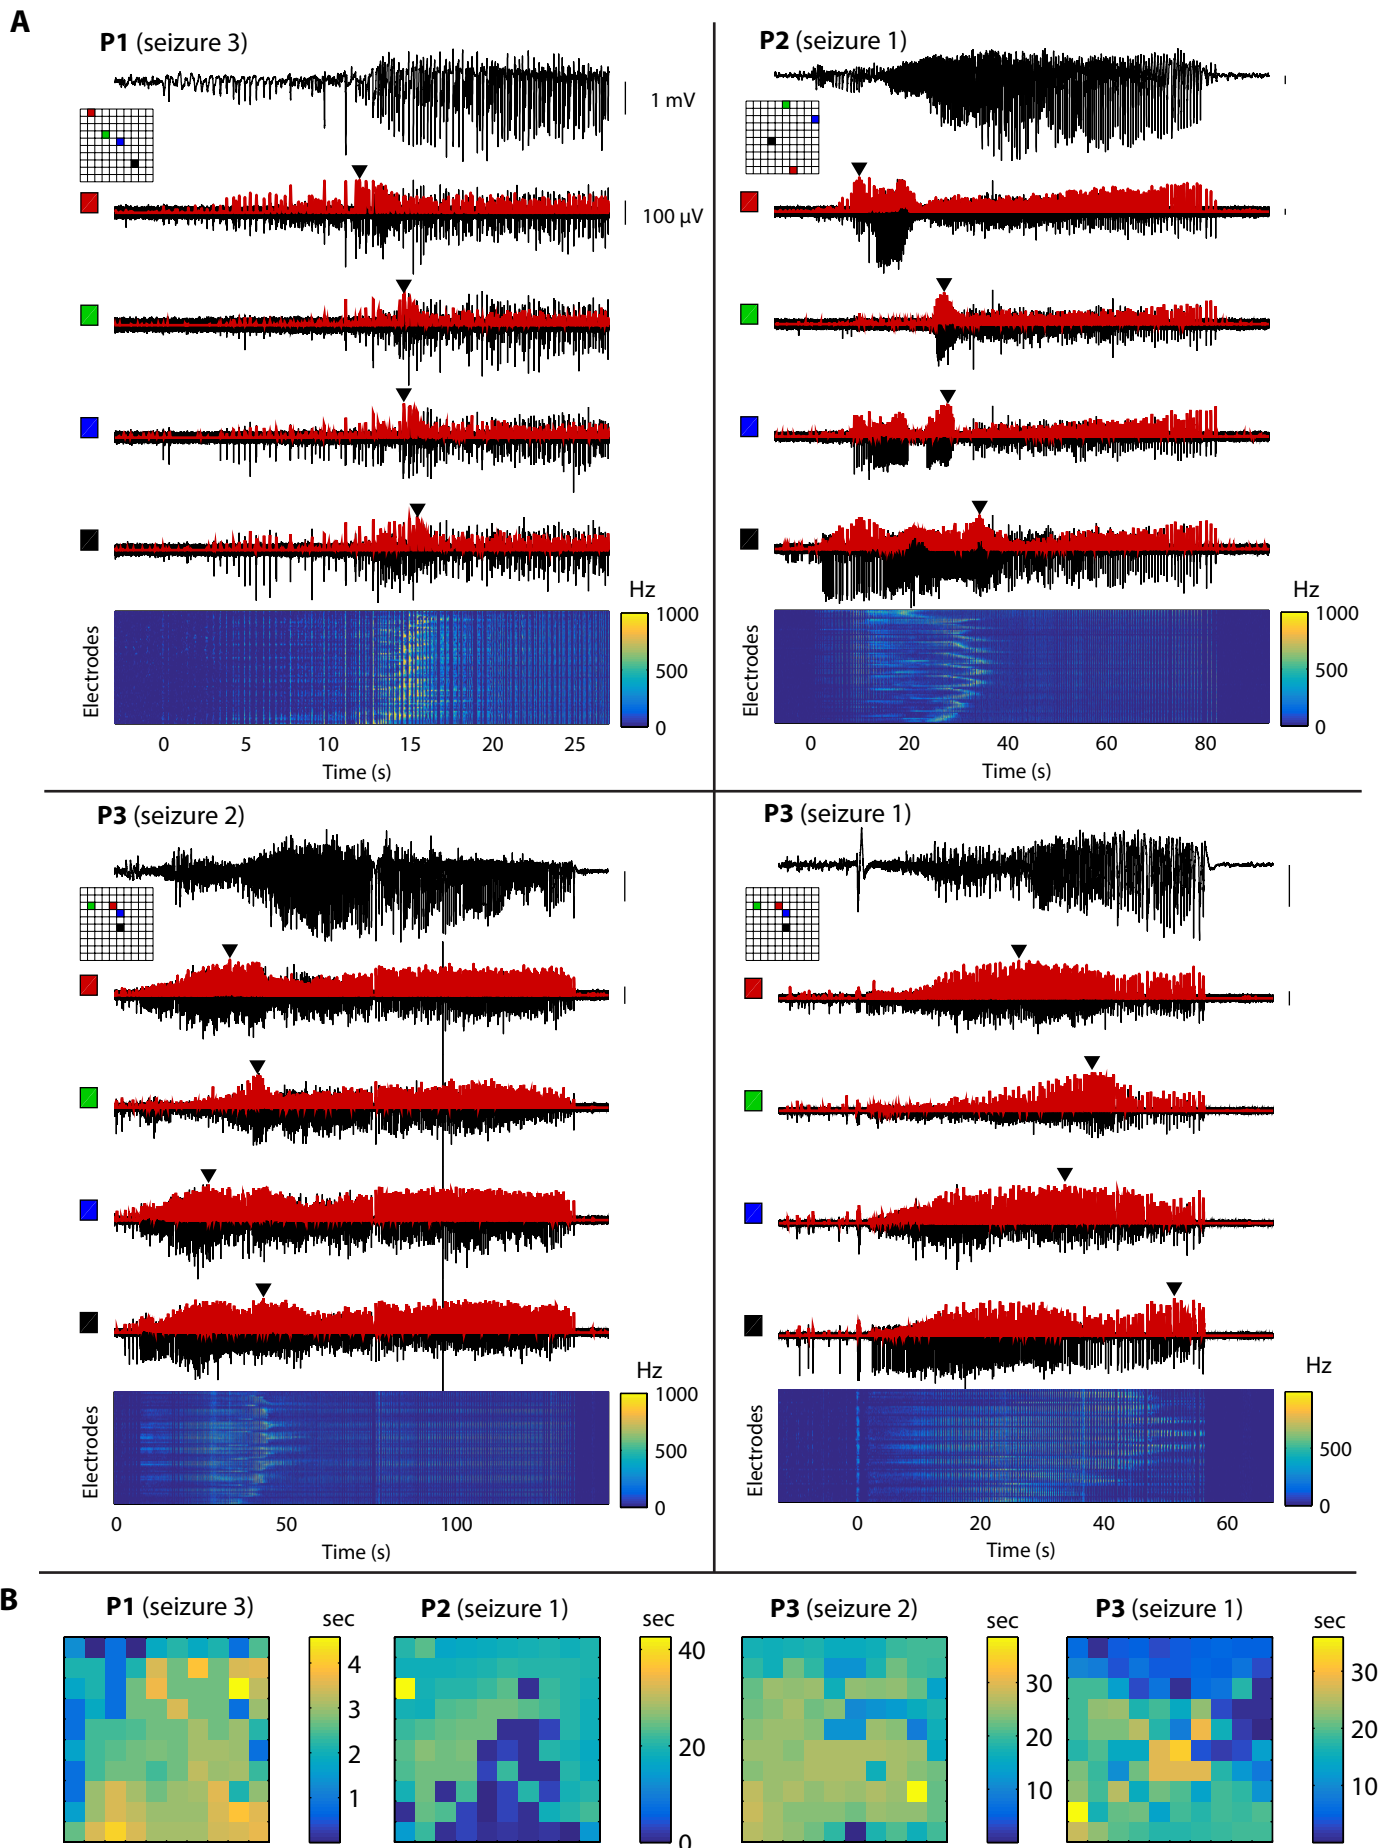

**Figure S1. Seizure propagation dynamics are complex and variable.**

Supplement: NIHMS715764-supplement-1.pdf [file NIHMS715764-supplement-1.pdf]
